# Supplementary material
Source: publisher site journal article supplement (https://www.dovepress.com/article/306456)
Supplement: Supplementary file 1 [file get_supplementary_file.php]

**Supplemental Table 1. The primers for RT-PCR in both mouse and human samples.**

| **Gene** | **Oligonucleotide sequence (5’-3’)** |
| --- | --- |
| **Mouse** |  |
| NAMPT | Forward, CGCACTACCTGGCTCAAGAA  Reverse, CAGAAGGGGGATGGCCAAAT |
| TNF-α | Forward, GCAAAGGGAGAGTGGTCAGG  Reverse, TTTGTTCCACGGGGGTCTTG |
| TGF-β1 | Forward, AGGAGACGGAATACAGGGCT  Reverse, CCACGTAGTAGACGATGGGC |
| IL1β | Forward, AAGCCTCGTGCTGTCGGACC,  Reverse, TGAGGCCCAAGGCCACAGGT |
| IL6 | Forward, CTCTGGGAAATCGTGGAAATG  Reverse, AAGTGCATCATCGTTGTTCATACA |
| IL8 | Forward, TGCTTTTGGCTTTGCGTTGA  Reverse, GAGGCATCCGGTTCACAGAA |
| IL18 | Forward, GTTTACAAGCATCCAGGCACAG  Reverse, GGGGTTCACTGGCACTTTGA |
| MCP-1 | Forward, CTGCTAAGGACCACTTGCCA  Reverse, CTCTGCCCTGTTTCCTTCGT |
| G-CSF | Forward, CTTCCGGGGGACAAGACATC  Reverse, TCTGTCCTCTCCTACCACGC |
| CXCL1 | Forward, GCCTCTAACCAGTTCCAGCA  Reverse, TTGTCAGAAGCCAGCGTTCA |
| CXCL2 | Forward, GGAAGCCTGGATCGTACCTG  Reverse, TGAAAGCCATCCGACTGCAT |
| Ire1α | Forward, CCGAACGTGATCCGCTACTTCT  Reverse, CGCAAAGTCCTTCTGCTCCACA |
| PAI1 | Forward, TGACGTCGTGGAACTGC  Reverse, GAAAGACTTGTGAAGTCGGC |
| MMP-1 | Forward, GACAGTGGAGGTGGCCTTAC  Reverse, TCTCAAAAGGGCGACTGACC |
| MMP-3 | Forward, TTGATGGGCCTGGAACAGTC  Reverse, AGTCCTGAGAGATTTGCGCC |
| TIMP-2 | Forward, TTGATGGGCCTGGAACAGTC  Reverse, AGTCCTGAGAGATTTGCGCC |
| β-actin | Forward, GACGGCCAGGTCATCACTATTG  Reverse, CCACAGGATTCCATACCCAAGA |
| **Human** |  |
| TNF-α | Forward, TTCTCATTCCTGCTTGTGG  Reverse, CTTGGTGGTTTGCTACGAC |
| TGF-β1 | Forward, GCCCAGCATCTGCAAAGC  Reverse, TCCTTGCGGAAGTCAATGTACA |
| IL1β | Forward, CAGTGGCAATGAGGATGACTTG  Reverse, GTAGTGGTGGTCGGAGATTCGTA |
| IL6 | Forward, TTGCCTTCTTGGGACTGAT,  Reverse, TTGCCATTGCACAACTCTT; |
| IL8 | Forward, TCCAAACCTTTCCACCCCAAA  Reverse, GTTTTCCTTGGGGTCCAGACA |
| IL18 | Forward, ACGCTTTACTTTATAGCTGAAGATG  Reverse, GAGGCCGATTTCCTTGGTCA |
| MCP-1 | Forward, AGCCACCTTCATTCCCCAAG  Reverse, TTGGGTTTGCTTGTCCAGGT |
| G-CSF | Forward, AGAAGCTGTGTGCCACCTAC  Reverse, GGCCATTCCCAGTTCTTCCA |
| CXCL1 | Forward, CACTGTGATAGAGGCTGGCG  Reverse, TCCAGTAAAGGTAGCCCTTGT |
| CXCL2 | Forward, AGATCAATGTGACGGCAGGG  Reverse, TCTCTGCTCTAACACAGAGGGA |
| Ire1α | Forward, TAGTCAGTTCTGCGTCCGCT  Reverse, TTCCAAAAATCCCGAGGCCG |
| PAI1 | Forward, GTTGTTGACACAAGAGAGCCC  Reverse, ACCCAAAAAGCCTAGGACCC |
| MMP-1 | Forward, CTCTGGAGTAATGTCACACCTCT  Reverse, TGTTGGTCCACCTTTCATCTTC |
| MMP-3 | Forward, TGAGGACACCAGCATGAACC  Reverse, ACTTCGGGATGCCAGGAAAG |
| TIMP-2 | Forward, AAGAACATCAACGGGCACCA  Reverse, AGAGCTGGACCAGTCGAAAC |
| β-actin | Forward, ACAGAGCCTCGCCTTTGCC  Reverse, TGGGGTACTTCAGGGTGAGG |

NAMPT: nicotinamide phosphoribosyltransferase；TNF-α: tumor necrosis factor-α; TGF-β1:transforming growth factor-β1; IL1β: interleukin 1β; IL6: interleukin 6; IL8: interleukin 8; IL18: interleukin 18; MCP-1: monocyte chemoattractant protein 1; G-CSF: granulocyte colony-stimulating factor; CXCL1: chemokine ligand 1; CXCL2: chemokine ligand 2; Ire1α: endoplasmic reticulum to nucleus signalling 1; PAI1: plasminogen activator inhibitor-1; MMP-1: matrix metalloproteinase-1; MMP-3: matrix metalloproteinase-3; TIMP-2: tissue inhibitors of metalloproteinase 2.
